# Supplementary material for: Involvement of the Nonneuronal Cholinergic System in Bone Remodeling in Rat Midpalatal Suture after Rapid Maxillary Expansion
Source: PubMed Central journal article supplement (PMC4958416; doi:10.1155/2016/8106067), 2016-07-10
Supplement: 8106067.f1.pdf [file 8106067.f1.pdf]

**Supplementary Table 1. Sequences of the primers used for Real-Time PCR.**

| Gene name   | Genbank      | Forward                  | Reverse                  |
|-------------|--------------|--------------------------|--------------------------|
| ChAT        | NC_005115    | GCCTGCTGCAACCAGTTCTT     | TCGTTGGACGCCATTTTGA      |
| CarAT       | NM_001004085 | ATTGTCGCTCTTGTGGACC      | TCTGTTTGGCCTTCTCTATGTC   |
| VACht       | X80395       | GCCACATCGTTCACTCTCTTG    | CGGTTTCATCAAGCAACACATC   |
| AChE        | S50879       | CTTCTCCCACACCTGTCC       | CTGCTTCCTGGTAGAGCC       |
| BChE        | NM_022942    | ACCTAACCTTGAACACAGAGAAG  | TTCCACTCTTGCTCCCTTTC     |
| CHT1        | NC_005108    | ATGGAACCTTGCTGATAGGATGGA | ATGATTCTCCCGATTGTTCTACAG |
| OCTN2       | NM_019269    | CGATCCCAGTGAGTTACAAGAC   | GAGAAAGTCCGAAGTAGCCC     |
| OCT1        | NM_012697    | TGGCCGTAAGCTCTGTCTCT     | TCAAGGTATAGCCGGACACC     |
| OCT2        | NM_031584    | ATGCTGGACCTGTTTCAGTC     | AGAAATCGCCATGAGAGCC      |
| OCT3        | NM_019230    | CAATGGGAAACACCTCTCGT     | ATACACCACGGCACTTGTGA     |
| SLC22a4     | NM_022270    | CTGGGAGTACAGCAAGGA       | GAAGGAGCCACAGAGAAC       |
| SLC25a20    | NM_053965    | AACCCATCAGTCCGCTTAAG     | TGGTCCCAGAGTACATAGGTG    |
| SLC25a29    | NM_001010958 | CCCGAGGAGTAGTAGGACTCAG   | CACAATCACACCTGCCACA      |
| SLC22a8     | NM_031332    | AGCACCAGAGACACCATTG      | ACAGTTCTCCAATCACAGGTC    |
| $\alpha$ 1  | NM_024485    | GTCACCCACTTTCCCTTCGA     | CAGGTCGGGCTGGTCACTT      |
| $\alpha$ 2  | NM_133420    | CGCTGGTCATCCCCTCAT       | GGGAGCGGTGGTGTACATTG     |
| $\alpha$ 3  | NM_052805    | TCCAGTTTGAGGTGTCCATG     | CTTGGTAGTCAGAGGGTTTCC    |
| $\alpha$ 4  | NM_024354.1  | CGCATCCCCTCTGAACTCAT     | CACTGCACCCTTCCGTCATA     |
| $\alpha$ 5  | NM_017078    | TGGACGCAACCAGCAAACATA    | TATGTCCACGAGCCGAATTTTC   |
| $\alpha$ 7  | AY574256     | GCTGGTTCCCTTTTGATG       | CTCCGTTGGGGATATAGC       |
| $\alpha$ 9  | RRU12336     | CGCGGTGCTGAATGTTACAC     | GTACGCATCGTGCCAGGTTT     |
| $\alpha$ 10 | AF196344     | CAGTCTCTCCCCAAAGTG       | GAGGTGGGCTTTAGATCC       |
| $\beta$ 1   | X74833       | TGGTTGTGGACCGTCTTTTTTC   | ATGACCCGAGGGTCCTCAAG     |
| $\beta$ 2   | L31622       | TTCTGCTGCTCATCTCCAA      | CGCTGGTGACGATGGAGAA      |
| $\beta$ 3   | NM_133597.1  | TGAAACACTCTGCGCTTGA      | TCCTGCAGTGGCCGTAAGA      |
| $\beta$ 4   | AY574260     | TGCTGGCACTCACGTTCTTC     | AAGGTGACCAGCACCATGGT     |
| delta       | NM_019298    | GCTCCCTCAAATTCAGTTCAC    | ACTATTTCCCACTCACCGTTC    |
| epsilon     | NM_017194    | CAATGTTCTGGTCTATGAGGGAG  | CTTCAGCATTGTAGGTCTGGG    |
| gamma       | NM_019145    | CACCTACTTCCCCTTCGATTG    | ATTCTCTGTGAAAGCCTCGG     |
| M1          | NM_080773    | TGGTTTCCTTCGTTCTCTGG     | GAGGAACTGGATGTAGCACTG    |
| M2          | J03025       | CCACTCCAGAGATGACAACCT    | GGCTACAACGTTCTGCTTT      |
| M3          | M16407       | GGAAGTGGATGTGGAGAG       | CGAGGAGTTGGTGTGAGA       |
| M4          | NM_031547    | CCCGCCGCACTACTAAGATG     | CCTCTTGCCCACCACAAACT     |
| M5          | M22926       | CAGCTGCTGCTCACAGACTCA    | GGGAAGGAACAGGGCATGAT     |
| RANKL       | NM_057149    | AGCGCTTCTCAGGAGTTCCA     | GCCGGGCCACATCGA          |

---

|                |           |                      |                       |
|----------------|-----------|----------------------|-----------------------|
| OPG            | U94330.1  | GCTGGCACACGAGTGATGAA | CGGTCTGCAGTTCCTTGCA   |
| $\beta$ -actin | NM_031144 | CTTCAACACCCCAGCCATGT | CAGAGGCATACAGGGACAACA |
| 18S            | M11188    | GCGGTTCTATTTGTTGG    | AATGCTTTCGCTCTGGTC    |

---

**Supplementary Table 2. Statistical data from Real-Time PCR results.**

| Gene              | 2- $\Delta\Delta$ Ct (Mean $\pm$ SD) |                    |                     |                     | p-value |
|-------------------|--------------------------------------|--------------------|---------------------|---------------------|---------|
|                   | C                                    | E1                 | E3                  | E7                  |         |
| OPG               | 0.668 $\pm$ 0.311                    | 0.900 $\pm$ 0.418  | 0.776 $\pm$ 0.381   | 0.161 $\pm$ 0.087   | 0.187   |
| RANKL             | 0.651 $\pm$ 0.357                    | 11.015 $\pm$ 1.302 | 0.229 $\pm$ 0.050   | 0.183 $\pm$ 0.126   | 0.102   |
| RANKL/OPG         | 0.928 $\pm$ 0.270                    | 8.354 $\pm$ 0.624  | 0.348 $\pm$ 0.162   | 1.034 $\pm$ 0.320   | 0.014*  |
| AChE              | 0.740 $\pm$ 0.233                    | 0.006 $\pm$ 0.068  | 0.065 $\pm$ 0.012   | 14.562 $\pm$ 11.347 | 0.007*  |
| BChE              | 0.645 $\pm$ 0.242                    | 0.066 $\pm$ 0.049  | 0.132 $\pm$ 0.206   | 3.882 $\pm$ 1.610   | 0.000*  |
| CarAT             | 0.520 $\pm$ 0.321                    | 0.197 $\pm$ 0.281  | 0.150 $\pm$ 0.218   | 0.205 $\pm$ 0.032   | 0.218   |
| VChT              | 0.702 $\pm$ 0.224                    | 0.007 $\pm$ 0.008  | 0.034 $\pm$ 0.010   | 11.769 $\pm$ 10.938 | 0.012*  |
| SLC22a4           | 0.717 $\pm$ 0.208                    | 0.060 $\pm$ 0.054  | 0.260 $\pm$ 0.263   | 6.610 $\pm$ 5.506   | 0.009*  |
| OCT1              | 0.616 $\pm$ 0.325                    | 0.006 $\pm$ 0.045  | 0.020 $\pm$ 0.021   | 26.990 $\pm$ 17.263 | 0.009*  |
| OCT3              | 0.486 $\pm$ 0.381                    | 0.019 $\pm$ 0.095  | 0.076 $\pm$ 0.115   | 1.487 $\pm$ 0.810   | 0.025*  |
| SLC25a20          | 0.497 $\pm$ 0.348                    | 0.026 $\pm$ 0.017  | 0.289 $\pm$ 0.438   | 0.227 $\pm$ 0.083   | 0.090   |
| nAChR $\alpha$ 1  | 0.807 $\pm$ 0.224                    | 0.005 $\pm$ 0.003  | 0.100 $\pm$ 0.098   | 35.44 $\pm$ 7.32    | 0.011*  |
| nAChR $\alpha$ 2  | 0.620 $\pm$ 0.294                    | 0.010 $\pm$ 0.0098 | 0.041 $\pm$ 0.022   | 13.644 $\pm$ 16.194 | 0.003*  |
| nAChR $\alpha$ 3  | 0.415 $\pm$ 0.409                    | 0.064 $\pm$ 0.070  | 0.076 $\pm$ 0.078   | 2.917 $\pm$ 2.242   | 0.027*  |
| nAChR $\alpha$ 5  | 0.856 $\pm$ 0.124                    | 0.050 $\pm$ 0.050  | 0.223 $\pm$ 0.108   | 24.474 $\pm$ 14.315 | 0.012*  |
| nAChR $\alpha$ 7  | 0.663 $\pm$ 0.260                    | 0.061 $\pm$ 0.027  | 0.197 $\pm$ 0.146   | 32.164 $\pm$ 33.129 | 0.014*  |
| nAChR $\alpha$ 10 | 0.459 $\pm$ 0.370                    | 0.066 $\pm$ 0.094  | 0.029 $\pm$ 0.024   | 15.363 $\pm$ 15.908 | 0.012*  |
| nAChR $\beta$ 1   | 0.617 $\pm$ 0.287                    | 0.046 $\pm$ 0.040  | 0.162 $\pm$ 0.164   | 24.120 $\pm$ 19.109 | 0.009*  |
| nAChR $\beta$ 2   | 0.702 $\pm$ 0.335                    | 0.023 $\pm$ 0.012  | 0.258 $\pm$ 0.198   | 11.771 $\pm$ 17.588 | 0.013*  |
| nAChR $\beta$ 4   | 0.422 $\pm$ 0.392                    | 0.993 $\pm$ 0.917  | 4.999 $\pm$ 6.654   | 5.325 $\pm$ 7.679   | 0.432   |
| nAChR $\gamma$    | 0.692 $\pm$ 0.318                    | 0.006 $\pm$ 0.0075 | 0.0003 $\pm$ 0.0005 | 1.183 $\pm$ 0.080   | 0.011*  |
| mAChR 1           | 0.631 $\pm$ 0.332                    | 0.056 $\pm$ 0.092  | 0.426 $\pm$ 0.472   | 14.472 $\pm$ 16.859 | 0.021*  |
| mAChR 2           | 0.438 $\pm$ 0.354                    | 0.058 $\pm$ 0.084  | 0.039 $\pm$ 0.033   | 7.000 $\pm$ 5.898   | 0.007*  |
| mAChR 3           | 0.779 $\pm$ 0.165                    | 0.051 $\pm$ 0.068  | 0.097 $\pm$ 0.088   | 22.186 $\pm$ 22.227 | 0.009*  |
| mAChR 4           | 0.773 $\pm$ 0.245                    | 0.029 $\pm$ 0.045  | 0.103 $\pm$ 0.149   | 16.180 $\pm$ 17.270 | 0.009*  |
| mAChR 5           | 0.576 $\pm$ 0.337                    | 0.022 $\pm$ 0.010  | 0.143 $\pm$ 0.078   | 19.734 $\pm$ 17.805 | 0.009*  |

\* statistically significant
